# Supplementary material
Source: PubMed Central journal article supplement (PMC4769113)
Supplement: NIHMS745879-supplement-supplement_1.pdf [file NIHMS745879-supplement-supplement_1.pdf]

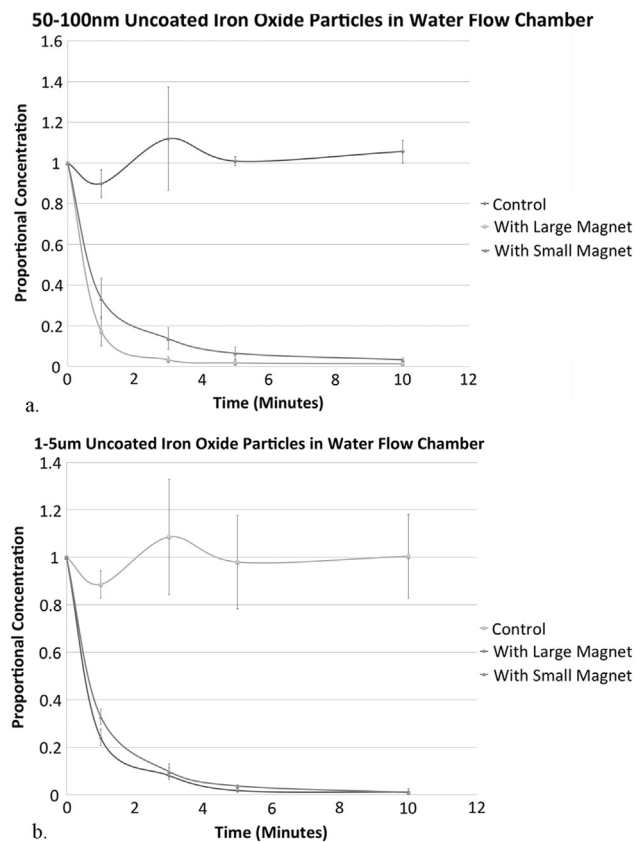

**Figure E1.** Concentration curves (ie, proportion remaining in solution compared with time 0 for each run, with error bars representing standard deviation) from flow chamber experiments and corresponding control experiments for 50–100-nm uncoated iron oxide particles in water (**a**) and 1–5- $\mu$ m uncoated iron oxide particles in water (**b**). The concentration decreased over time compared with controls. The inconsistency in measurements during the control experiments may in part reflect heterogeneous mixing and clumping of the uncoated particles in solution.
